# Supplementary material for: Recruitment of the autophagic machinery to endosomes during infection is mediated by ubiquitin
Source: PubMed Central journal article supplement — J Cell Biol. 2013 Oct 14;203(1):115–28. doi: 10.1083/jcb.201304188 (PMC3798248; doi:10.1083/jcb.201304188), 2013-10-14
Supplement: supp_jcb.201304188_JCB_201304188_sm.pdf [file supp_jcb.201304188_JCB_201304188_sm.pdf]

Fujita et al., <http://www.jcb.org/cgi/content/full/jcb.201304188/DC1>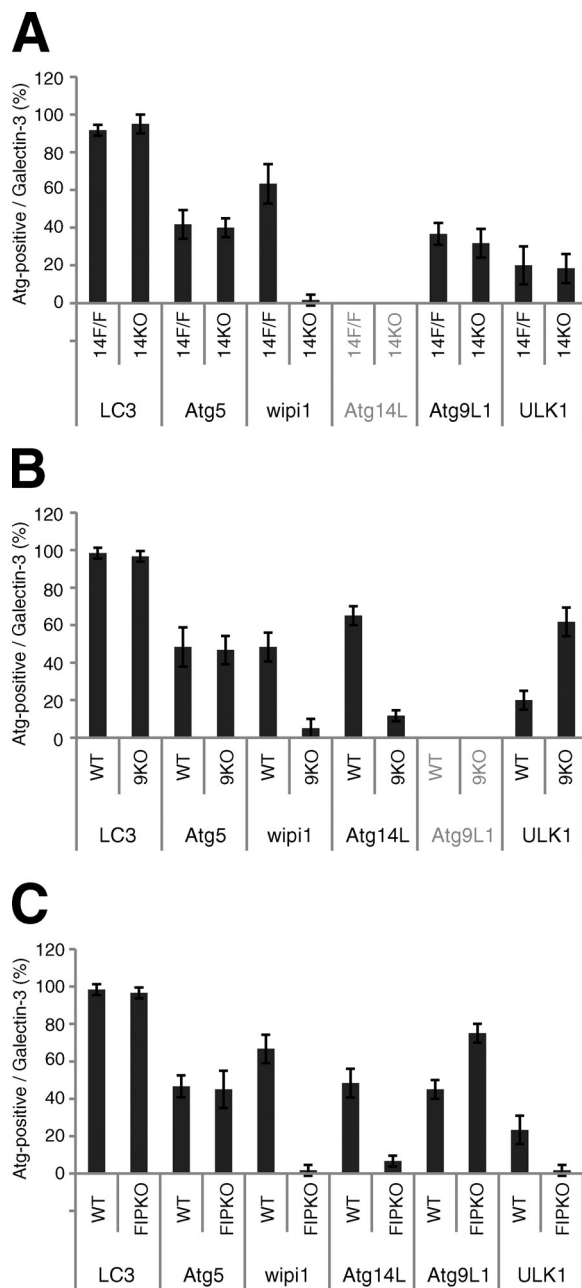

Figure S1. **Hierarchical analysis of Atg proteins in bead-transfected cells.** (A–C) Wild-type and autophagy-deficient cells (Atg14L-KO [A], Atg9L1-KO [B], and FIP200-KO [C]) stably expressing GFP-tagged LC3, Atg5, WIPI-1, Atg14L1, Atg9L1, or ULK1 were transfected with Effectene-coated latex beads for 3 h and subjected to immunocytochemistry for galectin3. The percentages of Atg-positive beads per galectin3-positive beads were enumerated. At least 30 beads were counted ( $n = 3$ ). The values indicate the mean  $\pm$  SD.

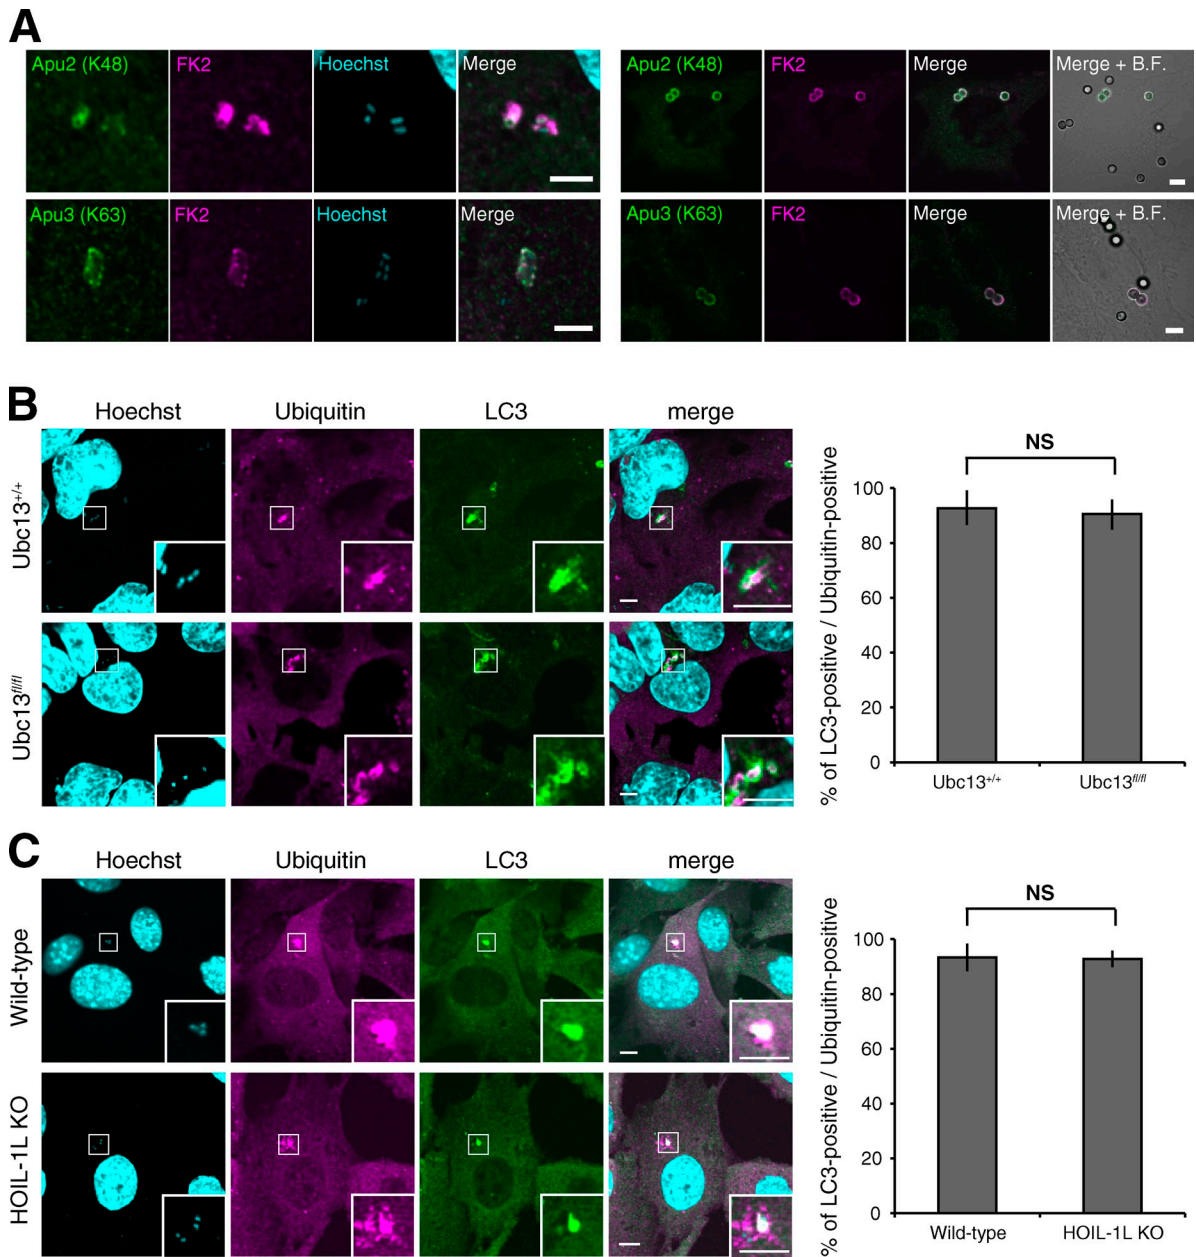

Figure S2. **Ub linkages in selective autophagy against invading *Salmonella* or transfected beads.** (A) HeLa cells were infected with *Salmonella* for 1 h (left) or transfected with Effectene-coated latex beads for 3 h (right), and then subjected to immunocytochemistry for poly-Ub (FK2) and K48-linked Ub (Apu2) or K63-linked Ub (Apu3). Bar, 5  $\mu$ m. (B) Ubc13<sup>+/+</sup> or Ubc13<sup>fl/fl</sup> MEFs were infected with *Salmonella* for 1 h and then subjected to immunocytochemistry for poly-Ub (FK2) and LC3. Bar, 10  $\mu$ m. The percentages of LC3-positive beads per Ub-positive *Salmonella* were enumerated. At least 30 Ub-positive *Salmonella* were counted ( $n = 3$ ). The values are the mean  $\pm$  SD. Statistical analysis was performed using Student's  $t$  test: NS, not significant. (C) Wild-type or HOIL-1L KO MEFs were infected with *Salmonella* for 1 h and then subjected to immunocytochemistry for poly-Ub (FK2) and LC3. Bar, 10  $\mu$ m. The percentages of LC3-positive beads per ubiquitin-positive salmonella were enumerated. At least 50 Ub-positive *Salmonella* were counted ( $n = 3$ ). The values are the mean  $\pm$  SD. Statistical analysis was performed using Student's  $t$  test. NS, not significant.

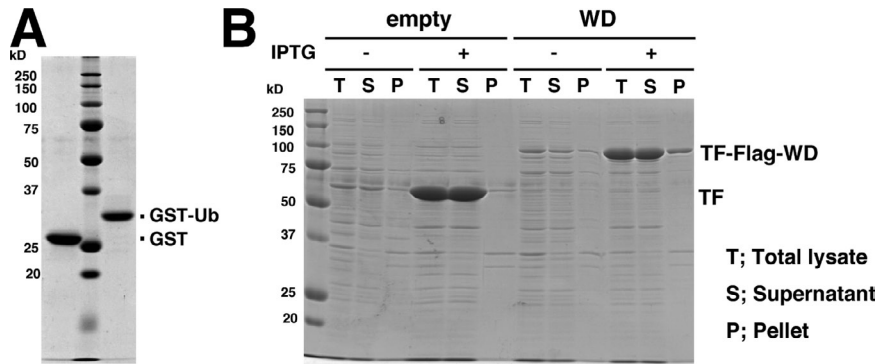

Figure S3. **Bacterially expressed recombinant proteins.** (A) GST or GST-ubiquitin were purified from *E. coli* lysates over glutathione Sepharose 4B and dialyzed with TBS. The recombinant proteins were subjected to SDS-PAGE followed by Coomassie brilliant blue staining. (B) *E. coli* BL21 (DE3) cells were transformed with the pCold-TF control (Empty) or pCold-TF encoding the WD40  $\beta$ -propellers of Atg16L1 (WD). To induce the expression of the recombinant proteins, the bacteria were incubated at 16°C for 12 h in the presence or absence of 100  $\mu$ M IPTG. Total cell lysates (T) were centrifuged at 15,000 rpm for 20 min and then separated into the soluble supernatant (S) and insoluble pellet (P).

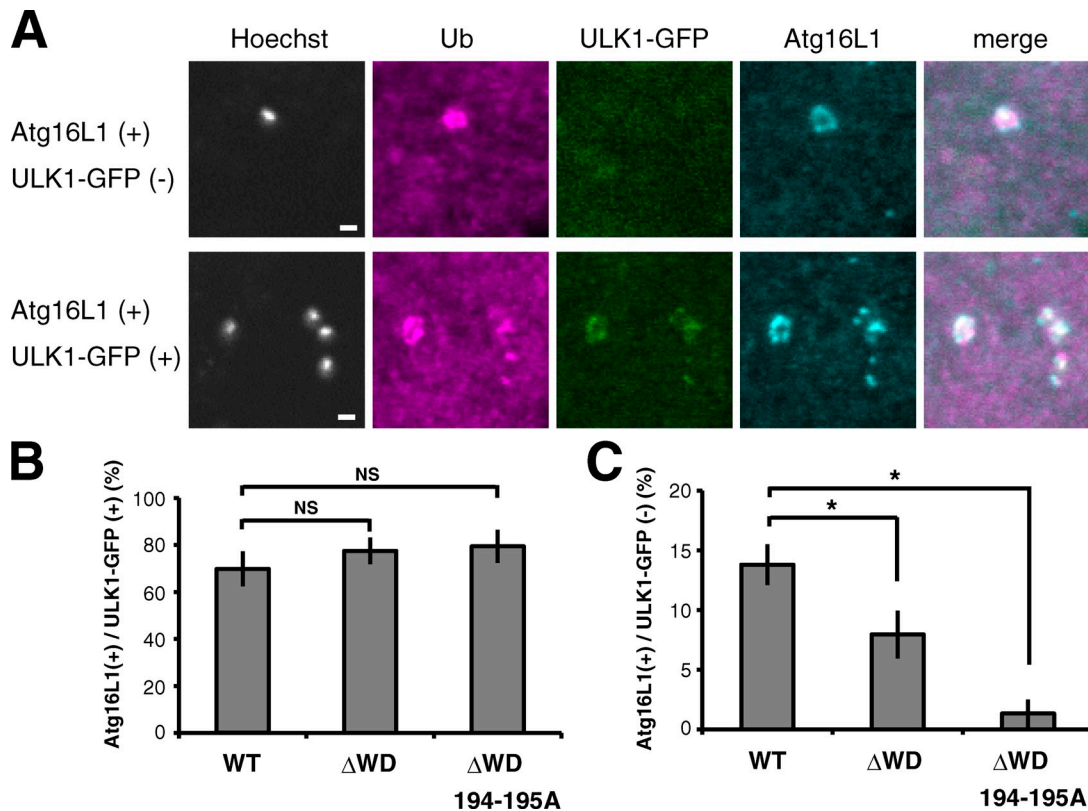

Figure S4. **Effect of deletion of WDR in Atg16L1 on the order of the Atg16L1 and ULK1-FIP200 complex recruitment to Ub-positive *Salmonella*.** Atg16L1- $\Delta/\Delta$  MEFs stably expressing both ULK1-GFP and Atg16L1 full-length,  $\Delta$ WD, or  $\Delta$ WD + 194–195A mutant were infected with *Salmonella* (MOI = 100) for 10 min, chased for another 10 min, and then fixed. The samples were analyzed by immunocytochemistry for Atg16L1 and Ub. Bar: (A) 1  $\mu$ m. The percentage of Atg16L1- and ULK1-GFP-positive bacteria per Ub-positive bacteria was enumerated by fluorescence microscopy (B and C). At least 50 bacteria were counted. The average  $\pm$  SD is shown for three independent experiments. Statistical analysis was performed using Student's *t* test. \*,  $P < 0.05$ ; NS, not significant.

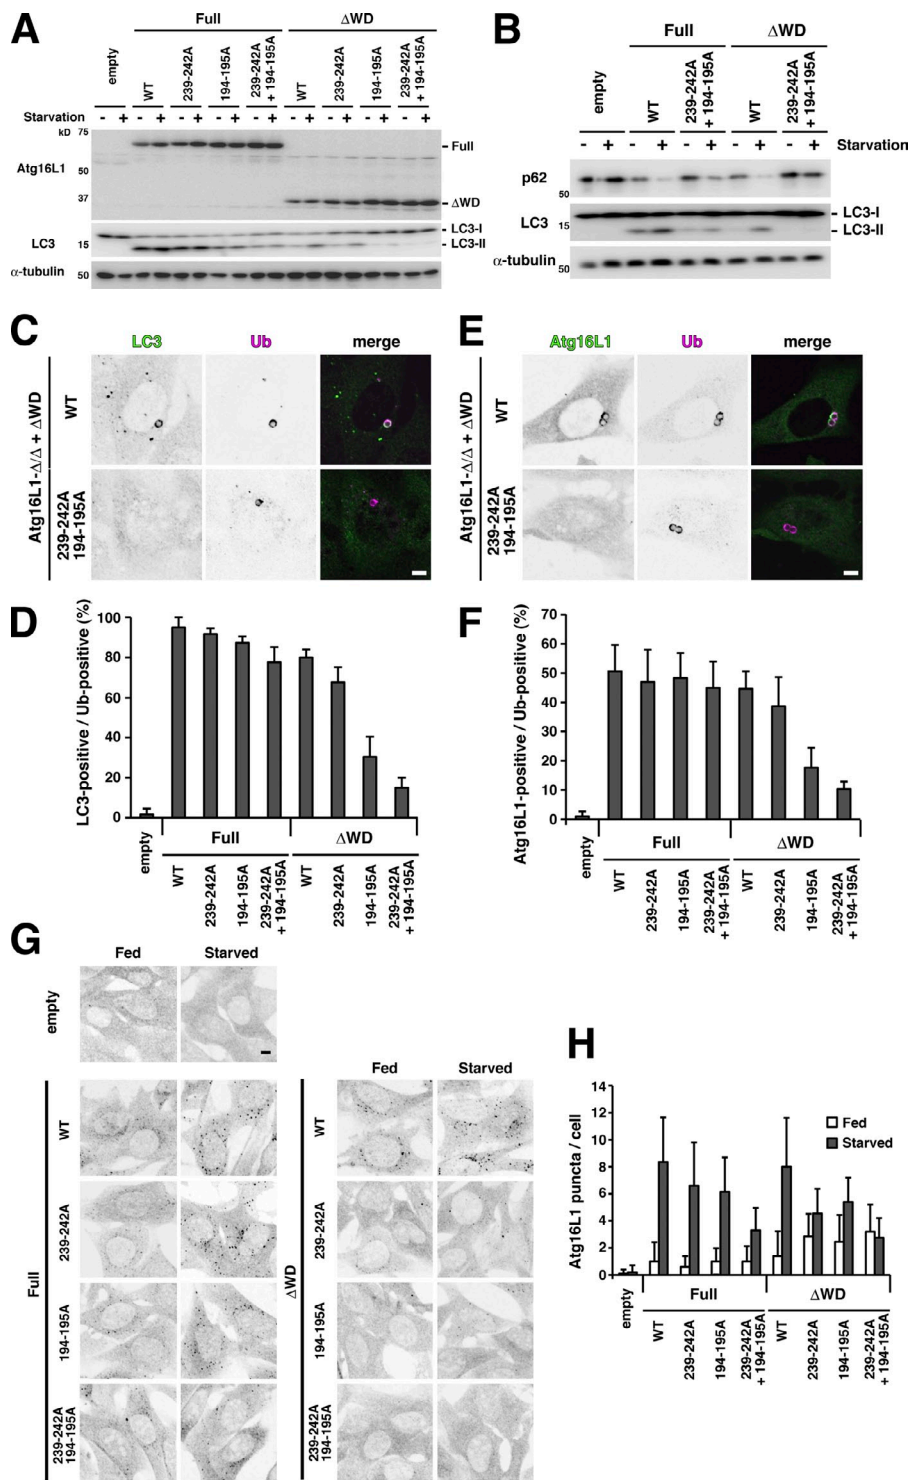

Figure S5. **Effect of Atg16L1 mutations on canonical and selective autophagy against transfected beads.** (A and B) Atg16L1- $\Delta/\Delta$  MEFs stably expressing the indicated constructs were cultured in growth medium (-) or EBSS (+) for 1 h (A) or 2 h (B) and then harvested. Total cell lysates were examined by Western blot analysis using the indicated antibodies. (C-F) Atg16L1- $\Delta/\Delta$  MEFs stably expressing the indicated constructs were transfected with beads for 3 h, and then analyzed by immunocytochemistry for LC3 (C) or Atg16L1 (E). Bar, 5  $\mu$ m. The percentage of LC3- or Atg16L1-positive beads per Ub-positive beads was enumerated by fluorescence microscopy (D and F). At least 50 beads were counted. The average  $\pm$  SD is shown for three independent experiments. (G) Atg16L1- $\Delta/\Delta$  MEFs stably expressing the indicated constructs were cultured in growth medium (Fed) or EBSS (Starved) for 1 h and subjected to immunocytochemistry using an anti-LC3 antibody. Bar, 5  $\mu$ m. (H) Atg16L1- $\Delta/\Delta$  MEFs stably expressing the indicated constructs were cultured in growth medium (Fed) or EBSS (Starved) for 1 h, and subjected to immunocytochemistry using an anti-Atg16L1 antibody. The number of Atg16L1 puncta in each cell was counted for more than 50 cells. The average  $\pm$  SD is shown for three independent experiments.

Table S1. FIP200 peptides detected by affinity purification and mass spectrometry analysis

| Peptide          | Mr(expt)  | Mr(calc)  | Delta   | Miss | Score | Expect   |
|------------------|-----------|-----------|---------|------|-------|----------|
| CTAVEIR          | 847.4356  | 847.4222  | 0.0135  | 0    | 14    | 2.6      |
| FKVPLGTK         | 888.5566  | 888.5433  | 0.0134  | 1    | 17    | 1.5      |
| EIVLEDLKK        | 1085.603  | 1085.6332 | -0.0301 | 1    | 22    | 0.35     |
| ELEDTLQVR        | 1101.5726 | 1101.5666 | 0.0061  | 0    | 64    | 2.10E-05 |
| IPLLECLTR        | 1113.6266 | 1113.6216 | 0.0051  | 0    | 47    | 0.00099  |
| LDSELSALER       | 1131.598  | 1131.5771 | 0.0209  | 0    | 64    | 2.30E-05 |
| ENIINDLSDK       | 1159.579  | 1159.5721 | 0.007   | 0    | 47    | 0.0012   |
| VKHLENQIAK       | 1178.693  | 1178.6771 | 0.0159  | 1    | 24    | 0.22     |
| GELANNLHVR       | 1192.6408 | 1192.6312 | 0.0096  | 0    | 77    | 1.10E-06 |
| EAVICLQNEK       | 1202.6074 | 1202.5965 | 0.011   | 0    | 61    | 3.90E-05 |
| ELAQGFLANQK      | 1217.641  | 1217.6404 | 0.0006  | 0    | 50    | 0.00064  |
| DQCISELISR       | 1219.5934 | 1219.5867 | 0.0068  | 0    | 30    | 0.047    |
| EQCDFNSLTK       | 1226.5378 | 1226.5237 | 0.0141  | 0    | 61    | 3.20E-05 |
| TLQLKEEENK       | 1230.6574 | 1230.6455 | 0.0119  | 1    | 36    | 0.014    |
| KENIINDLSDK      | 1287.6808 | 1287.667  | 0.0138  | 1    | 47    | 0.001    |
| FLEQLEEQEK       | 1291.6422 | 1291.6296 | 0.0127  | 0    | 32    | 0.033    |
| LMSQSMSSVSSR     | 1298.6078 | 1298.5959 | 0.012   | 0    | -74   | 1.80E-06 |
| SLLEQETENLR      | 1330.6794 | 1330.6728 | 0.0066  | 0    | 70    | 5.30E-06 |
| TTNESLTSFVK      | 1336.6942 | 1336.6874 | 0.0068  | 0    | 80    | 4.00E-07 |
| STELVSPDMR       | 1343.6868 | 1343.6755 | 0.0114  | 0    | 52    | 0.0003   |
| GDSSSLVAELQEK    | 1361.6722 | 1361.6674 | 0.0048  | 0    | 96    | 1.20E-08 |
| AELQSLQSHLK      | 1381.7353 | 1381.7201 | 0.0152  | 0    | 14    | 1.8      |
| TQLALEMYEVAK     | 1394.7214 | 1394.7115 | 0.0099  | 0    | 64    | 1.90E-05 |
| LDSLPEHEDSEK     | 1397.6436 | 1397.631  | 0.0126  | 0    | 39    | 0.0052   |
| ENIINDLSDKLK     | 1400.7552 | 1400.7511 | 0.0042  | 1    | 64    | 1.60E-05 |
| DKDLIESLSEDR     | 1418.6958 | 1418.6889 | 0.007   | 1    | 71    | 3.70E-06 |
| FLEQLEEQEKR      | 1447.7412 | 1447.7307 | 0.0106  | 1    | 49    | 0.00053  |
| KFDCELPDISLK     | 1463.745  | 1463.733  | 0.012   | 1    | 17    | 0.84     |
| ASVSGTSPQSASSPR  | 1488.7264 | 1488.7168 | 0.0096  | 0    | 62    | 3.10E-05 |
| LYALDQMIASCGR    | 1496.7242 | 1496.7115 | 0.0127  | 0    | 72    | 2.70E-06 |
| VTSLHNQAFEIEK    | 1514.7792 | 1514.7729 | 0.0064  | 0    | 54    | 0.00015  |
| GELVCLLEEVQNK    | 1529.7808 | 1529.7759 | 0.0049  | 0    | 69    | 5.50E-06 |
| LKGELVCLLEEVQNK  | 1770.954  | 1770.9549 | -0.0009 | 1    | 46    | 0.00086  |
| LKGELVCLLEEVQNK  | 1770.9637 | 1770.9549 | 0.0087  | 1    | -33   | 0.017    |
| IQDNNENYQVGLAELR | 1874.92   | 1874.9122 | 0.0078  | 0    | 93    | 1.80E-08 |
| TSLIAEQQTNFNTVLR | 1935.0058 | 1935.0061 | -0.0003 | 0    | 57    | 6.50E-05 |

ATG5-ATG12-ATG16L1 protein complexes were affinity purified on Strep-Tactin matrices, and co-purifying proteins were identified by mass spectrometry. In brief, co-purifying proteins were identified after SDS-PAGE separation and band excision. Proteins were digested with trypsin and identified by separating the peptide mixtures by liquid chromatography with online tandem mass spectrometry (LC-MS/MS). Mr(expt), experimental molecular weight (Da); Mr(calc), calculated molecular weight (Da); Delta, mass error (Da); Miss, number of missed cleavages; expect, expectation value.



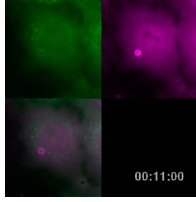

Video 1. **Dynamics of LC3 and galectin3 in autophagy against transfected bead.**

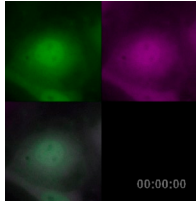

Video 2. **Dynamics of Ub and galectin3 in autophagy against transfected bead.** (S1 and S2) NIH3T3 cells stably expressing mStrawberry (mStr)-Gal3 (magenta) and GFP-LC3 (green, S1) or mStr-Gal3 (magenta) and GFP-Ub (green, S2) were transfected with Effectene-coated latex beads for 30 min and then washed. Live cells were observed at 1-min intervals using a microscope (model IX81; Olympus) equipped with a xenon lamp and cooled charge-coupled device camera (CoolSnap HQ; Roper Scientific) under the control of MetaMorph software. Time is shown in h:min:s.

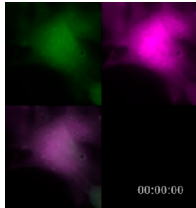

Video 3. **Dynamics of LC3 and Ub in autophagy against transfected bead.**

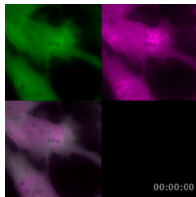

Video 4. **Dynamics of Atg5 and Ub in autophagy against transfected bead.**

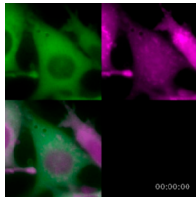

Video 5. **Dynamics of WIPI-1 and Ub in autophagy against transfected bead.**

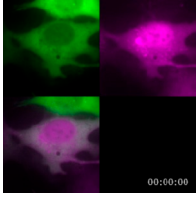

Video 6. **Dynamics of Atg14L and Ub in autophagy against transfected bead.**

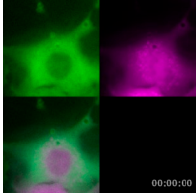

Video 7. **Dynamics of ULK1 and Ub in autophagy against transfected bead.** (S3–S7) NIH3T3 cells stably expressing mStr-Ub (magenta) and GFP-tagged (green) LC3 (S3), Atg5 (S4), WIPI-1 (S5), Atg14L1 (S6), or ULK1 (S7) were transfected with Efectene-coated latex beads for 30 min. Live cells were observed at 1-min intervals using a microscope (model IX81; Olympus) equipped with a xenon lamp and cooled charge-coupled device camera (CoolSnap HQ; Roper Scientific) under the control of MetaMorph software. Time is shown in h:min:s. We excluded Atg9L1 in this experiment because Atg9L1 localized to the trans-Golgi network and early endosomes under steady-state conditions, which cannot be distinguished from recruitment to bead-containing endosomes (Young et al., 2006; Kageyama et al., 2011).

## References

- Kageyama, S., H. Omori, T. Saitoh, T. Sone, J.L. Guan, S. Akira, F. Imamoto, T. Noda, and T. Yoshimori. 2011. The LC3 recruitment mechanism is separate from Atg9L1-dependent membrane formation in the autophagic response against *Salmonella*. *Mol. Biol. Cell.* 22:2290–2300. <http://dx.doi.org/10.1091/mbc.E10-11-0893>
- Young, A.R., E.Y. Chan, X.W. Hu, R. Köchl, S.G. Crawshaw, S. High, D.W. Hailey, J. Lippincott-Schwartz, and S.A. Tooze. 2006. Starvation and ULK1-dependent cycling of mammalian Atg9 between the TGN and endosomes. *J. Cell Sci.* 119:3888–3900. <http://dx.doi.org/10.1242/jcs.03172>
